# Supplementary material
Source: publisher figshare collection journal article supplement (https://sage.figshare.com/ndownloader/files/17619050)
Supplement: Supplementary file 1 [file 17619050]

## Appendix 7 – Summary of studies reporting TEA in OA patients

| Study                                   | Study Design            | Population                                      | Intervention (s)                   | Follow up                      | Outcome                                              | Results                                                                                                                                                                                            |
|-----------------------------------------|-------------------------|-------------------------------------------------|------------------------------------|--------------------------------|------------------------------------------------------|----------------------------------------------------------------------------------------------------------------------------------------------------------------------------------------------------|
| Schoch et al. 2017<br>[61]<br><br>N =18 | Prospective case series | Mean age 68 (51-85)<br>62% female<br>Primary OA | 78% Coonrad-Morrey<br>17% Latitude | Mean FU 8.9 years (2-20 years) | ROM<br>MEPS<br>Complications<br>Revision<br>Survival | Mean flexion arc 87° to 105°<br>MEPS 38% excellent, 15% good, 46% fair<br><br>50% Complications<br>11% revision; 5.5% infection and 5.5% periprosthetic fracture<br>10 year Implant survival 89.4% |

OA – osteoarthritis, ROM – range of motion, MEPS – Mayo Elbow Performance score.
